# 1 **Factors linked to changes in mental health outcomes among** 2 **Brazilians in quarantine due to COVID-19**

3  
4 Matthew Stults-Kolehmainen<sup>1,2</sup>, Alberto Filgueiras<sup>3</sup>, Miguel Blacutt<sup>2</sup>

5  
6 <sup>1</sup> Digestive Health Multispecialty Clinic, Yale – New Haven Hospital, New Haven, CT USA

7 <sup>2</sup> Department of Biobehavioral Sciences, Teachers College, Columbia University, New York,  
8 NY, USA

9 <sup>3</sup> Department of Cognition and Human Development, Rio de Janeiro State University, Rio de  
10 Janeiro, Brazil

11  
12 Corresponding author:

13 Alberto Filgueiras

14 Rua São Francisco Xavier, 524, Bloco F, Sala 10.015

15 Maracanã, Rio de Janeiro, RJ, Brasil

16 Postal Code: 20550-900

17 Email address: [albertofilgueiras@gmail.com](mailto:albertofilgueiras@gmail.com)

18

## 19 **Abstract**

20 This aim of this investigation was to track changes and risk factors for mental health outcomes  
21 during state-mandated quarantine in Brazil. Adults residing in Brazil (n = 360, 37.9 years old,  
22 68.9% female) were surveyed at the start of quarantine and approximately three weeks later.  
23 Outcomes assessed included perceived stress, state anxiety and symptoms of depression. Aside  
24 from demographics, behaviours and attitudes assessed included exercise, diet, use of tele-  
25 psychotherapy and number of COVID-19 related risk factors, such as perceived risk of COVID-  
26 19, information overload, and feeling imprisoned. Overall, all mental health outcomes worsened  
27 from Time 1 to time 2, although there was a significant gender x time interaction for stress. 9.7%  
28 of the sample reported stress above the clinical cut-off (2 SD above mean), while 8.0% and 9.4%  
29 were above this cut-off for depression and anxiety, respectively. In repeated measures analysis,  
30 female gender, worsening diet and an excess of COVID-19 information was related to all mental  
31 health outcomes. Positive dietary changes were associated with decreases in depression and  
32 anxiety. Exercise frequency was positively related to state anxiety and perceived stress (0  
33 days/week > 6 days/week). Those who did aerobic exercise did not have significantly increase in  
34 depression. Use of tele-psychotherapy predicted lower levels of depression and anxiety. In  
35 multiple regression, anxiety was predicted by the greatest number of COVID-19 specific factors.  
36 In conclusion, mental health outcomes worsened for Brazilians within the first month of  
37 quarantine and these changes are associated with a variety of risk factors.

38 **Keywords:** COVID-19; SARS-Cov-2; Depression; Anxiety; Stress

## 39 **Introduction**

40 Mental health consists of the set of emotions, thoughts and behaviours that enable  
41 individuals to work, cope and deal with problems in everyday tasks (World Health Organization,  
42 2004). Historically, although researchers from the biomedical sciences dedicated more time and  
43 resources in the study of physical health, findings from the last 50 years have slowly captured the  
44 interest of scientists from diverse fields to look upon mental health to explain somatic diseases,  
45 physical functioning, quality-of-life, well-being and work productivity, (Christensen et al., 1999;  
46 Prince et al., 2007; Stults-Kolehmainen et al., 2014). For instance, mental health is associated  
47 with disability-adjusted life years (DALYs) and premature mortality (Vigo et al., 2019) with  
48 17% of DALYs attributable to mental health in Brazil and 22% in the United States. Those with  
49 worse mental health, such as higher levels of chronic stress, have a greater risk for physical  
50 health problems, such as cardiovascular disease (Stults-Kolehmainen, 2013). Poor mental health  
51 costs society a significant amount of money, in terms of lost productivity, strain on healthcare  
52 systems, loss of income and other consequences (Trautmann et al., 2016). Conversely, recent  
53 research from the World Health Organization suggests that every American-dollar spent in  
54 mental health care is equivalent to a return of four American-dollars in better well-being and  
55 ability to work (Wilson, 2016). Thus, a person with good mental health is likely physically  
56 healthy, happy, productive, and can contribute to a greater functioning of society (Prince et al.,  
57 2007; Wilson, 2016).

58 The recent outbreak of the Coronavirus Disease 2019 (COVID-19), caused by SARS-  
59 CoV-2, around the world at the end of 2019 and the beginning of 2020 led to a series of  
60 guidelines to avoid mass contamination and limit its lethality (World Health Organization, 2020).  
61 Quarantine, confinement, and social-distancing have been common measures taken to limit the  
62 spread of COVID-19 (Wilder-Smith and Freedman, 2020). As a result, for periods of time people  
63 have not been able to freely from their homes, they have needed to keep a 2-meter physical  
64 distance from one another on the streets, and infected people are obliged to be confined in  
65 hospitals or their own homes without any kind of physical proximity to others. These restrictions  
66 are intended to benefit the physical health and safety of all people and it is widely accepted that  
67 these regulations save lives. However, these measures have come at a cost to the mental health  
68 and well-being a substantial proportion of the population (Rubin and Wessely, 2020).  
69 Furthermore, not all individuals in Brazil adhered to quarantine guidelines when they were in  
70 force Obedience of Brazilians to social isolation during quarantine peaked at 63% on March 23<sup>rd</sup>  
71 2020 and dropped to 47% in April 2020 (INLOCO, 2021) perhaps explaining why Brazil had the  
72 highest contagion rate ( $R_0 = 2.81$ ) in the world during April, 2020 (Imperial College COVID-19  
73 Response Team, 2021).

74 An updated systematic review on the effects of social distancing and quarantine on  
75 mental health revealed that anxiety, depression, stress, anger, insomnia, hopelessness, and  
76 sadness were all increased during those conditions (Brooks et al., 2020). A recent study (Hu et  
77 al., 2020) from a cross-national sample ( $n = 992$ ) in China found that state-anxiety scores

78 significantly increased as strictness of quarantine increased across the following conditions: no  
79 quarantine, closed community, voluntary quarantine, fully closed community, forced quarantine  
80 at home, medical observation, and centralized quarantine. Other behavioural problems also  
81 appear during this period; participants in a nationwide survey recently published in China  
82 reported nutritional issues, lack of ability to exercise and numerous changes in daily routines and  
83 habits (Qiu et al., 2020). Accordingly, psychosocial and behavioural dimensions seem associated  
84 under quarantine conditions (Filgueiras and Stults-Kolehmainen, 2021; Blacutt et al., 2021).  
85 Similar findings were also depicted in research conducted in other quarantine situations, such as:  
86 the Severe Acute Respiratory Syndrome (SARS) epidemic in Canada (Hawryluck et al., 2004),  
87 Taiwan (Bai et al., 2004) and Hong Kong (Lee et al., 2005), the Middle East Respiratory  
88 Syndrome (MERS) epidemic caused by another strain of coronavirus in Korea (Jeong et al.,  
89 2016) and the equine influenza epidemic in Australia (Taylor et al., 2008). Altogether, the  
90 evidence suggests that quarantine leads to an increase of mental health problems. Specific to  
91 Brazil, Blacutt et al. (2021) recently found significant increases in the incidence, prevalence, and  
92 severity of stress, depression, and anxiety in the early phases of the COVID-19 pandemic in a  
93 sample of people from Brazil.

94 Identifying risk factors that modify the mental health experience of quarantine and social  
95 isolation is important. Research among people in normal and healthy conditions has shown that  
96 sociodemographic variables, health behaviours and other daily routines are linked to better  
97 mental health. Among the most commonly investigated demographic variables are gender  
98 (Almeida and Kessler, 1998; Nolen-Hoeksema and Hilt, 2009), education (Steele et al., 2007)  
99 and age (Christensen et al., 1999). For health behaviours, a large literature suggests that  
100 moderate to vigorous physical exercise from three to five times per week leads to reduced  
101 anxiety (Wipfli et al., 2008), depression (Craft and Landers, 1998; de Oliveira et al., 2018), stress  
102 (Stults-Kolehmainen and Sinha, 2014) and other mental health issues (Landers and Arent, 2007).  
103 Similar associations are found with dietary habits; a diet low in fat, sugar or carbohydrate tends  
104 to be associated with fewer psychological issues (Molendijk et al., 2018; O'Neil et al., 2014).  
105 Aside from these health behaviors, finding and receiving mental health support is imperative for  
106 many individuals at risk. Psychologists and other mental health practitioners who provide online  
107 or tele-psychotherapy may also help to improve mental health conditions (Varker et al., 2019).

108 Unfortunately, resources are scarce in every field of the health system, including those for  
109 mental health (Qiu et al., 2020). Therefore, it is pivotal to establish a priori where and how to  
110 invest those scarce resources. This is a difficult task because the current stressor is highly unique.  
111 Quarantine is due to a pandemic of truly global proportions that has reached every level of  
112 society, with a long but discontinuous and intermittent duration, resulting in remarkable social  
113 upheaval (World Health Organization, 2020). There is little research on the association between  
114 psychological, demographic and behaviour variables in the general population during society-  
115 wide social isolation. Furthermore, it is a consensus that psychological phenomena, such as stress  
116 and depression, are multifactorial in their etiology and manifestation, with a large amount of  
117 variables to consider (Wilson, 2016; World Health Organization, 2004). In order to help

118 governments, service providers and scientists to establish public policies toward resource  
119 allocation in mental health during the continued COVID-19 pandemic crisis, this study aimed to  
120 fill the gap in the current literature. Three psychological dimensions were queried due to their  
121 relevance in the literature: (i) perceived stress (Hawryluck et al., 2004; Qiu et al., 2020), (ii)  
122 depression (Brooks et al., 2020) and (iii) state anxiety (Jeong et al., 2016; Rubin and Wessely,  
123 2020). The aims of this investigation were two-fold. First, this research was intended to track  
124 mental health changes over two time points during quarantine. The second objective was to  
125 associate mental health outcomes with pertinent demographic, behavioural and COVID-19  
126 specific factors.

127

## 128 **Materials & Methods**

129 The present research is a longitudinal psychosocial study that collected data in two  
130 periods: the first week of state-mandated quarantine (São Paulo, 2020) and approximately three  
131 weeks after this mandate. The Ethical Committee of the first author's institution approved the  
132 project under the process #2020.2014-0932-12. Participants were allowed to leave the online  
133 questionnaires at any time and procedures obeyed the Declaration of Helsinki.

134 Volunteers were recruited through a snowball sampling method, which started by posting  
135 messages about the research study on social media (Heckathorn, 2011). We recruited 360 (248  
136 women, 68.9%) Brazilians or foreigners living in Brazil from 9 States and 23 different cities.  
137 This research was conducted in Brazilian Portuguese, so it was necessary to know how to read  
138 and write in this language. All participants digitally signed the Term of Consent and agreed to be  
139 contacted after the first round of data collection to be part of the second round.

140 There were four instrument measures adopted: a sociodemographic and attitudinal  
141 questionnaire. Mental health outcome variables were assessed at Time 1 and Time 2, these  
142 included the Perceived Stress Scale with 10 items (PSS-10), the Filgueiras Depression Inventory  
143 (FDI) and the State subscale of the State-Trait Anxiety Inventory (S-STAI). At Time 1,  
144 participants additionally answered a 9-item sociodemographic questionnaire, which included the  
145 following question in this order: (i) age, (ii) gender, (iii) education, (iv) height, (v) weight, (vi)  
146 whether the participant had any physical risk factor for COVID-19, and whether he/she used one  
147 of the following during quarantine: (vii) telepsychotherapy, (viii) telemedicine, (ix) online  
148 nutritionist and/or an online fitness coach. At Time 2, participants were asked about their  
149 quarantine nutrition, exercise habits, and quarantine information, which included the following  
150 questions: (i) frequency of exercise during quarantine in days, (ii) whether there were changes in  
151 the frequency of exercise comparing before and during quarantine (“no changes”; “increased  
152 exercise frequency” and “decreased exercise frequency”) and (iii) types of exercise (“aerobic”;  
153 “anaerobic”; “both”; or “no exercise”), (iv) change in diet (“for the worse”; “neutral”; or “for the  
154 better”), (v) weight gain during quarantine (“none”; “less than 5kg”; or “more than or equal to  
155 5kg”), and (vi) weight loss (“none”; “less than 5kg”; or “more than or equal to 5kg”).

156 Additionally at Time 2, participants were asked about: (vii) the amount of COVID-19  
157 information the participant felt he/she was receiving (“Too much information”; “Enough  
158 information”; or “Little information”). Another three items were provided on a five-point Likert-  
159 type scale ranging from 1 “Totally agree” to 5 “Totally disagree”; the items were: (viii) “Do you  
160 feel imprisoned due to this quarantine?”, (ix) “Do you feel you are able to understand what is  
161 happening?”, (x) “Do you trust your own ability to differentiate good from bad sources of  
162 information?”.

163 The PSS-10 (Cohen and Williamson, 1998) is a 10-item questionnaire that asks  
164 individuals about their perceptions regarding stress-like symptoms. It is answered on a five-point  
165 Likert-type scale ranging from 0 “Never” to 4 “Very often” (scores range from 0-40). The  
166 population mean is 17.0 (SD = 5.02) with a score over 27 indicating excessive stress (Cacciari et  
167 al., 2016). The FDI (Filgueiras et al., 2014) is a 20-item scale that asks individuals to grade the  
168 level of association between the respondent’s own self-perception and one-word items extracted  
169 from depression symptoms listed in the DSM-V in the last fortnight. It is rated on a six-point  
170 Likert-type scale ranging from 0 “not related to me at all” to 5 “totally related to me” (scores  
171 range from 0-100). The reference mean is 53.3 (SD = 17.3) with 88 or higher indicating a cut-off  
172 for depressive symptomology (Filgueiras et al., 2014). The S-STAI (Spielberger et al., 1983) is a  
173 subscale of a broader questionnaire that assess state (i.e., one’s current mood state) and trait (i.e.,  
174 dispositional and personality-related traits) anxiety. The focus of S-STAI is the mood state of the  
175 respondents who answer questions about her/his own feelings on a four-point Likert-type scale  
176 ranging from 1 “not at all” to 4 “very much so” (scores range from 0-80). Gender-specific  
177 reference means are 36.5 (SD = 21.4) for men and 43.7 (12.6) for women, with cut-offs being 66  
178 for men and 69 for women (Pasquali et al., 1994)

179 Volunteers of the present research answered the questionnaires in the Google Forms  
180 online platform that was configured in the same order of presentation: 1) Term of Consent, 2)  
181 demographic and attitudinal questionnaire, 3) PSS-10, 4) FDI, 5) S-STAI, 6) Thank you page.  
182 Those participants who answered “no” to the Term of Consent were addressed to the Thank you  
183 page without having any exposure to the other questionnaires. The first round of data collection  
184 (time 1) took place between March 20<sup>th</sup> and March 25<sup>th</sup>, 2020, whereas the second round (time 2)  
185 happened between April 15<sup>th</sup> and April 20<sup>th</sup>, 2020.

186 After data collection, Google Spreadsheets were utilized to consolidate the database and  
187 to export it in the .csv format. Then, researchers used SPSS (IBM, version 21.0) to run the  
188 analyses. Descriptive statistics of PSS-10, FDI and S-STAI were calculated for each categorical  
189 (demographic) variable with exception of those that were answered with the Likert-type scales.  
190 Due to the large amount of variables collected on an online platform, Cronbach’s alpha ( $\alpha$ ) was  
191 calculated for the three scales at time 1 and time 2; results were expected to show  $\alpha > .70$ . To  
192 ensure the quality of data, beyond reliability, one-sample normality was tested using  
193 Kolmogorov-Smirnov analysis with the expectation non-significant results. Pairwise t-test  
194 comparisons between groups were computed to identify significant differences between the first



195 round (time 1) and second round (time 2) of data collection for the whole sample. A repeated-  
196 measures ANOVA was performed to compare within and between groups for each demographic  
197 independent variable. Furthermore, prevalence of stress, depression and anxiety-like symptoms  
198 were calculated in percentage of participants above the means and cut-off points respective to the  
199 norms developed in previous studies in the Brazilian sample (Cacciari et al., 2016; Filgueiras et  
200 al., 2014; Pasquali et al., 1994)

201 A correlation matrix of the PSS-10, FDI and S-STAI results at time 1 and time 2 were  
202 calculated using Pearson correlation to identify possible discrepancies, significant associations,  
203 and validity of these measures. Additionally, exercise frequency at time 2 was included in the  
204 correlation matrix to identify significant associations with mental health variables. To assess  
205 correlations between continuous mental health scores and ordinal nutrition and exercise variables  
206 recorded at Time 2 (diet change for the better, weight gain, weight loss, and change in exercise  
207 frequency), Kendall rank correlations coefficients were calculated. For all correlations,  
208 significance was deemed when  $p < .05$ . The authors opted to compute three Linear Multiple  
209 Regressions (LMR) using the stepwise method to find the strength and ability of independent  
210 variables (i.e., demographic, behavioural and attitudinal) to predict PSS-10, FDI and S-STAI  
211 total scores at time 2. Total scores of mental health questionnaires at time 1 were put in the first  
212 step of the LMR, and the other variables were put in the second step. Categorical items were  
213 identified as dummy variables, whereas Likert-type answers were computed as ordinal data. The  
214 criterion for keeping a variable in the regression was the same as with other null-hypothesis tests  
215 (i.e., pairwise t-test and repeated-measures ANOVA); significance was deemed when  $p < 0.05$ .  
216 The coefficient beta ( $\beta$ ) was inspected to reveal the direction and strength of the association  
217 between independent and dependent variables; whereas the coefficient of determination ( $r^2$ )  
218 revealed the amount of variance explained by the model.

219 Finally, effect-sizes for the t-test of the LMR and the repeated-measures ANOVA  
220 (between, within and interaction) were calculated using the software G\*Power 3.1, which also  
221 provided the interpretation criteria. The t-test effect-size was measured with Cohen's d; the rule  
222 of thumb for this measure is: above 0.20 and below 0.50, the effect is small, above 0.50 and  
223 below 0.80, the effect is moderate, above 0.80 the effect is large. The repeated-measure  
224 ANOVA effect-size was measured by Cohen's f and categorization goes as follows: above 0.10  
225 and below 0.30, the effect is small, above 0.30 and below 0.50 the effect is moderate, and above  
226 0.50 the effect is large.

## 227 **Results**

228 Participants reported an age average of 37.90 (SD=12.33) years and were in quarantine  
229 for 3.52 (SD=1.77) days in the first round of data collection and 19.08 (SD=3.86) days in the  
230 second round. In terms of education, 98 volunteers reported to have either begun or finished high  
231 school (27.2%), 175 had either begun or finished began College (48.6%), 57 had either begun or  
232 finished a Master's course (15.8%) and 30 (8.3%) had either begun or finished their PhD.

233 Participants reported changes in diet during the second round of data collection in  
234 reference to the first round. One hundred and sixteen participants (32.2%) reported to have  
235 worsened their diets from time 1 to time 2, 59 (16.4%) reported no significant changes in diet  
236 habits, whereas 185 (51.4%) answered that they were having a better diet than when they began  
237 quarantine.

238 At time 1, those reporting no exercise were 219 (60.8%), 1-to-3 days a week N=72  
239 (20.0%) and 4 or more days a week N=69 (19.2%). At time 2, no exercise was 69 (19.2%), 1-to-  
240 3 days a week N=14 (3.9%) and 4 or more days of exercise N=277 (76.9%). No one reported  
241 exercising 7 days a week. This was in contrast to perceptions of change in exercise. One hundred  
242 eleven (30.8%) of respondents reported exercising less, 147 (40.8%) reported the same level of  
243 exercise and 102 (28.3%) reported more exercise. The percentage of women and men who did  
244 tele-psychotherapy was 72.8% and 27.2%, respectively.

245 Even though data collection used an online platform and participants had to answer a  
246 large amount of questions, Scales were reliable according to the adopted criterion ( $\alpha > .70$ ) in  
247 both time 1 and 2. The PSS-10 had  $\alpha = .855$  in the first round and  $\alpha = .834$  in the second round.  
248 The FDI presented  $\alpha = .911$  and  $\alpha = .954$  in times 1 and 2, respectively. The SSTAI showed  $\alpha =$   
249  $.759$  in the first time period and  $\alpha = .713$  in the second time period. Normality of continuous  
250 variables were also ensured in both Times 1 and 2. The PSS-10 presented a normal distribution  
251 in the first data collection with  $KS=1.189$ ;  $p = .119$ , whereas in the second data collection it was  
252  $KS=.836$ ;  $p = .487$ . The FDI had the following results: Time 1 was  $KS=1.309$ ;  $p = .065$  and Time  
253 2 was  $KS=1.093$ ;  $p = .135$ . Finally, SSTAI had normality in Time 1 for  $KS=.978$ ;  $p = .294$  and  
254 Time 2 for  $KS=1.115$ ;  $p = .166$ .

255 Table 1 depicts average and standard deviation (SD) of PSS-10, FDI and SSTAI stratified  
256 by the independent variables at time 1 and time 2. Mental health variables worsened significantly  
257 from the first round of data collection to the second, i.e., stress ( $p = .007$ ), depression ( $p =$   
258  $.00003$ ) and anxiety ( $p = .004$ ). Repeated-measures ANOVA revealed that within-group effects  
259 were significant for all outcomes (criterion  $p < .05$ ) demonstrating that from time 1 to time 2  
260 there was an increase in stress, depression, and anxiety. Across all mental health outcome  
261 variables, significant between-group effects were observed for the following 3 predictors: 1.  
262 gender (women had significantly higher scores than men), 2. changes in diet (participants who  
263 felt that their diet worsened reported increased levels of psychological issues), and 3. amount of  
264 information (those who reported to receive too much information about COVID-19/quarantine  
265 also showed greater mental health dysfunction). Effect sizes ranged from .01 to .51. A gender x  
266 time interaction was observed ( $p < .001$ ) for perceived stress. Men did not change in stress level  
267 but women had a significant increase (effect size = .28).

268 Beyond those three variables, between groups significant differences regarding perceived  
269 stress occurred for four other variables: number of days of exercise per week, type of exercise,  
270 use of online fitness coaching and risk for COVID-19. Regarding symptoms of depression,  
271 statistical differences appeared for four other variables: education, type of exercise, use of online

272 nutritionists and use of tele-psychotherapy. Finally, regarding state anxiety, between groups  
 273 significant differences were shown for two other variables: risk for COVID-19 and use of tele-  
 274 psychotherapy. Results for the repeated-measures ANOVA are depicted in the supplemental  
 275 material.

276

277 **Table 1.** Psychosocial variables: Perceive Stress, Depression and Anxiety symptoms by  
 278 demographic and behavioural independent variables.

| Independent Variables                 | Psychosocial Variable     |                 |                  |                  |                        |                  |
|---------------------------------------|---------------------------|-----------------|------------------|------------------|------------------------|------------------|
|                                       | Perceived Stress (PSS-10) |                 | Depression (FDI) |                  | State Anxiety (S-STAI) |                  |
|                                       | Time 1                    | Time 2          | Time 1           | Time 2           | Time 1                 | Time 2           |
| <i>Whole Sample (N=360)</i>           | 20.54 (6.99)              | 22.03 (6.45)**  | 65.32 (24.96)    | 70.31 (25.44)*** | 43.61 (21.51)          | 49.88 (20.13)**  |
| <i>Gender</i>                         |                           |                 |                  |                  |                        |                  |
| Men (N=112)                           | 17.87 (7.59)              | 17.28 (5.85) †  | 54.98 (23.75)    | 59.79 (25.42)**  | 36.53 (21.52)          | 45.87 (22.01)*** |
| Women (N=248)                         | 21.75 (6.35)              | 24.18 (5.50)*** | 69.98 (24.12)    | 75.06 (24.03)**  | 46.81 (20.77)          | 51.69 (18.98)**  |
| <i>Education</i>                      |                           |                 |                  |                  |                        |                  |
| High School (N=98)                    | 20.94 (7.04)              | 22.73 (6.19) *  | 74.46 (23.67)    | 80.91 (21.38)**  | 46.40 (22.32)          | 53.36 (20.56)*** |
| Bachelor Degree (N=175)               | 22.33 (6.91)              | 21.30 (6.38) *  | 61.51 (24.67)    | 67.27 (24.78)**  | 41.55 (20.69)          | 48.21 (19.46)*** |
| Master's Degree (N=57)                | 21.39 (7.05)              | 23.14 (6.39) †  | 64.16 (24.22)    | 65.05 (27.52) †  | 45.82 (21.74)          | 49.32 (20.24) †  |
| Doctorate (N=30)                      | 19.74 (6.91)              | 21.87 (7.49) †  | 59.83 (25.53)    | 63.43 (28.24) †  | 42.30 (22.77)          | 49.30 (21.83) *  |
| <i>Changes in Diet</i>                |                           |                 |                  |                  |                        |                  |
| For worse (N=116)                     | 21.23 (7.26)              | 23.26 (6.61)*** | 72.78 (26.04)    | 76.40 (23.52)**  | 54.41 (22.24)          | 67.47 (13.73)*** |
| No changes (N=59)                     | 21.05 (6.45)              | 22.95 (5.53) *  | 67.39 (24.15)    | 71.12 (25.97) †  | 46.76 (21.15)          | 47.49 (17.15) †  |
| For better (N=185)                    | 19.95 (6.96)              | 20.97 (6.47) *  | 59.98 (23.31)    | 66.24 (25.77)*** | 35.83 (17.76)          | 39.60 (16.63)**  |
| <i>Changes in Exercise Frequency</i>  |                           |                 |                  |                  |                        |                  |
| Fewer days (N=111)                    | 20.69 (7.79)              | 21.29 (7.35) †  | 63.19 (25.05)    | 69.33 (25.65)**  | 43.27 (22.96)          | 51.41 (22.13)**  |
| Same frequency (N=147)                | 20.47 (6.60)              | 21.97 (6.31)*   | 65.71 (25.29)    | 70.88 (25.32) *  | 42.97 (21.00)          | 48.67 (19.13) *  |
| More days (N=102)                     | 20.48 (6.67)              | 22.78 (5.52)**  | 67.06 (24.96)    | 70.55 (25.61) *  | 44.90 (20.76)          | 49.95 (19.31) *  |
| <i>Days of Exercise</i>               |                           |                 |                  |                  |                        |                  |
| 0 days (N=69)                         | 22.91 (7.70)              | 26.41 (7.57)*** | 69.03 (25.24)    | 74.58 (24.82)**  | 48.23 (21.90)          | 54.67 (20.52)**  |
| 3 days (N=34)                         | 16.86 (7.47)              | 17.40 (7.18) †  | 62.71 (26.21)    | 69.79 (26.08) *  | 46.93 (25.72)          | 55.43 (21.02) †  |
| 4 days (N=135)                        | 21.38 (7.47)              | 21.73 (5.75) †  | 64.54 (25.07)    | 69.25 (25.35) *  | 43.26 (21.60)          | 50.85 (19.58)*** |
| 5 days (N=80)                         | 19.88 (6.62)              | 21.44 (4.83) *  | 66.70 (23.18)    | 70.60 (24.91) *  | 41.92 (19.64)          | 46.24 (18.48) *  |
| 6 days (N=42)                         | 20.29 (5.34)              | 22.21 (4.35) †  | 59.29 (27.59)    | 66.19 (25.44) *  | 40.05 (23.06)          | 45.67 (23.02)**  |
| <i>Type of Exercise</i>               |                           |                 |                  |                  |                        |                  |
| Aerobic (N=107)                       | 20.51 (7.01)              | 20.74 (6.04) †  | 59.36 (23.56)    | 60.23 (26.28) †  | 42.08 (21.07)          | 47.21 (20.39) *  |
| Anaerobic (N=122)                     | 20.00 (6.36)              | 21.11 (5.46) *  | 67.17 (24.85)    | 75.21 (23.30)*** | 43.21 (21.25)          | 50.04 (18.82)*** |
| Both (N=62)                           | 19.02 (6.80)              | 21.21 (6.80) *  | 67.81 (25.82)    | 74.58 (24.82) *  | 41.87 (22.14)          | 48.81 (21.21) *  |
| None (N=69)                           | 22.91 (7.70)              | 26.41 (7.57)*** | 69.03 (25.24)    | 74.58 (24.82)**  | 48.23 (21.90)          | 54.67 (20.52)**  |
| <i>Amount of information</i>          |                           |                 |                  |                  |                        |                  |
| Few information (N=18)                | 20.78 (7.89)              | 21.39 (6.56) †  | 60.78 (28.74)    | 66.17 (28.86) †  | 34.11 (18.05)          | 37.67 (19.05)**  |
| Enough information (N=153)            | 19.50 (6.76)              | 20.75 (6.30) *  | 61.52 (23.62)    | 66.22 (26.54) *  | 33.68 (17.63)          | 37.26 (16.16)**  |
| Too much information (N=189)          | 21.36 (7.01)              | 23.13 (6.39)**  | 68.83 (25.26)    | 74.02 (23.71)**  | 52.55 (20.83)          | 61.25 (16.10)*** |
| <i>Use of telemedicine</i>            |                           |                 |                  |                  |                        |                  |
| Yes (N=40)                            | 22.05 (6.73)              | 22.43 (5.16) †  | 63.58 (24.82)    | 66.88 (24.72) †  | 41.05 (17.36)          | 47.65 (17.89) *  |
| No (N=320)                            | 20.35 (7.01)              | 21.98 (6.60)**  | 65.53 (25.01)    | 70.74 (25.53)**  | 43.93 (21.98)          | 50.15 (20.40)*** |
| <i>Use of online nutrition</i>        |                           |                 |                  |                  |                        |                  |
| Yes (N=86)                            | 20.89 (6.78)              | 22.09 (6.42)**  | 67.56 (24.83)    | 72.11 (25.63)**  | 44.89 (21.79)          | 48.16 (19.77)**  |
| No (N=274)                            | 19.43 (7.54)              | 21.83 (6.58)**  | 58.17 (24.15)    | 64.59 (24.10)**  | 39.52 (20.20)          | 55.35 (20.39)*** |
| <i>Use of online fitness coaching</i> |                           |                 |                  |                  |                        |                  |
| Yes (N=142)                           | 20.97 (6.86)              | 22.74 (6.59)**  | 65.82 (24.85)    | 70.82 (25.78)**  | 43.17 (21.46)          | 49.99 (20.27)**  |
| No (N=218)                            | 19.89 (7.15)              | 20.94 (6.09)**  | 64.55 (25.20)    | 69.53 (24.99)**  | 44.28 (21.66)          | 49.70 (19.97) *  |
| <i>Use of telepsychotherapy</i>       |                           |                 |                  |                  |                        |                  |
| Yes (N=136)                           | 20.57 (6.52)              | 21.94 (6.24)**  | 61.88 (23.12)    | 64.72 (24.04) *  | 42.54 (21.12)          | 47.46 (19.67)**  |
| No (N=224)                            | 20.52 (7.27)              | 22.08 (6.59)**  | 70.97 (26.87)    | 79.51 (25.09)**  | 45.38 (22.11)          | 53.85 (20.30)**  |
| <i>Risk for COVID-19</i>              |                           |                 |                  |                  |                        |                  |
| Yes (N=98)                            | 23.59 (6.79)              | 27.14 (6.14)**  | 66.49 (25.21)    | 72.32 (25.58)**  | 48.96 (21.10)          | 58.74 (18.36)**  |
| No (N=262)                            | 19.40 (6.73)              | 20.12 (5.45) *  | 64.88 (24.90)    | 69.56 (25.40)**  | 41.61 (21.36)          | 46.56 (19.78)**  |

Note: \*  $p < 0.05$ ; \*\*  $p < 0.01$ ; \*\*\*  $p < 0.001$ ; † non-significant difference

279

280

281 For perceived stress, 237 (65.8%) and 269 (74.7%) of participants scored above the  
 282 population mean at time 1 and 2, respectively. Prevalence of excessive stress ( $\geq 2$  SD above  
 283 reference mean) was 6.9% (IC 95 5.2%-8.6%) in the first round and 9.7% (IC 95 8.2%-11.2%) in  
 284 the second round. Of the 34 individuals in this category, 94% of these individuals were women.  
 285 82% did no exercise at all, but the remaining 18% reported 6 days a week of exercise. Also, 0%  
 286 utilized tele-psychotherapy. Regarding symptoms of depression, 224 (62.2%) and 260 (72.2%)  
 287 of participants were above the reference mean at Time 1 and 2, respectively. High levels of



288 symptoms of depression ( $\geq 2$  SD above reference mean) had a prevalence of 4.2% (IC 95 3.6%-  
289 4.8%) at time 1 and 8.0% (IC 95 7.1%-8.9%) at time 2. Participants  $> 2$  SD ( $n = 24$ ) were  
290 mostly women (88%) and did not utilize tele psychotherapy (88%). The number of male  
291 participants above the reference mean for state anxiety was 54 (48.2%) and 72 (64.3%) at time 1  
292 and 2, respectively. For women it was 132 (53.2%) and 163 (65.7%). Prevalence of excessive  
293 state anxiety ( $\geq 2$  SD above reference mean) was 8.7% (IC 95 7.4%-10.0%) in the first round  
294 against 14.9% (IC 95 12.3%-17.5%) in the second round. Those  $> 2$  SD had worsening diet (45  
295 of 53 participants) and reported no tele-psychotherapy (81%).

296 All mental health outcome variables had significant positive correlations with each other,  
297 which can be seen in Figure 1. The strongest correlations were observed in intertemporal  
298 correlations of the same variable ( $r = .61$  for PSS-10,  $r = .79$  for FDI, and  $r = .69$  for STAI-S).  
299 Small to moderate significant associations were seen between different mental health variables ( $r$   
300  $= .13 - .50$ ). Higher exercise frequency at Time 2 had negative correlations with all mental health  
301 variables, which was significant for stress and anxiety, but not for depression. Kendall rank  
302 correlations were conducted to test the association between continuous mental health variables,  
303 and ordinal nutritional and exercise variables collected at Time 2 (diet change, weight gain,  
304 weight loss, and change in exercise frequency). Diet change was coded so that a higher score  
305 reflects a diet change for the better. It was found that positive change in diet had a negative  
306 association with FDI Time 1 ( $\tau = -.18, p = .01$ ), FDI Time 2 ( $\tau = -.14, p = .01$ ), STAI Time 1 ( $\tau$   
307  $= -.30, p = < .001$ ), and STAI Time 2 ( $\tau = -.49, p < .001$ ). No significant associations were  
308 found between weight loss at Time 2 and perceived stress at any time. No significant  
309 associations were found between mental health outcome variables and weight loss or change in  
310 exercise frequency, at any time, with the exception of a negative association between greater  
311 weight loss and STAI Time 2 ( $\tau = -.36, p = .026$ )

312

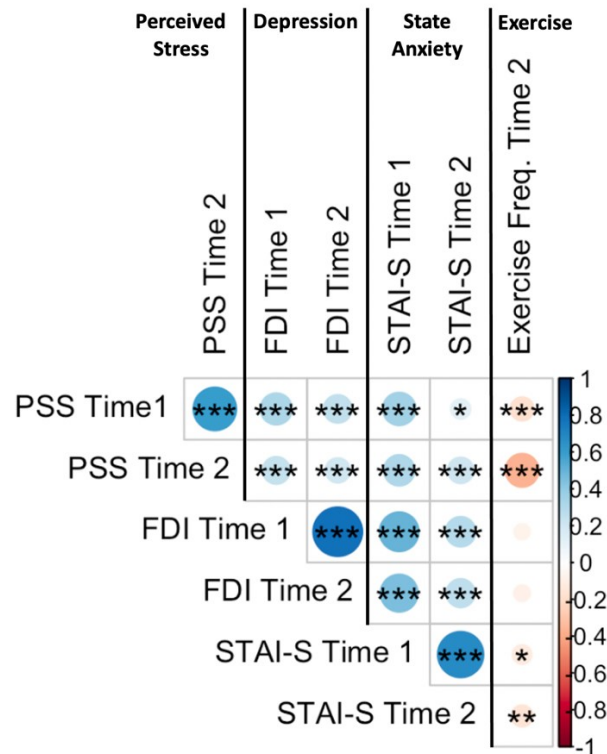

313  
 314 **Figure 1.** Pearson correlation of psychosocial variables (Perceive Stress, Depression and  
 315 Anxiety) at Time 1 and Time 2, and exercise frequency at Time 2. Time 1 comprises data  
 316 collection between March 20<sup>th</sup> and 25<sup>th</sup>, while Time 2 entails data collection between April 15<sup>th</sup>  
 317 and 20<sup>th</sup>. Size and color of circle indicate the strength and direction of correlation. \* < *p* .05, \*\* *p*  
 318 < .01, \*\*\* *p* < .001

319 The linear multiple regression (LMR) model for perceived stress revealed that the  
 320 dependent variable (PSS-10, time 2) was predicted by the score of the PSS-10 at time 1, number  
 321 of days of exercise, risk for COVID-19, types of exercise, changes in the frequency of exercise,  
 322 feeling imprisoned, days in quarantine and gender in order of strength of the coefficient  $\beta$ .  
 323 Altogether, those variables explained 56% of the variance. The symptoms of depression LMR  
 324 showed that the dependent variable (FDI time 2) was predicted by the score of the FDI time 1,  
 325 types of exercise, own ability to understand what is happening, level of education and gender  
 326 respectively. The independent variables explained 33% of the variance of depression in the  
 327 second round of data collection. Finally, the state anxiety LMR depicted that the dependent  
 328 variable (S-STAI time 2) was predicted, in order of association, risk for COVID-19, feeling safe,  
 329 the score of S-STAI time 1, weight loss, changes on diet, amount of COVID-19 information,  
 330 feeling imprisoned and age. The independent variables of this LMR explained cumulatively 42%  
 331 of the variance. Table 2 presents the coefficient  $\beta$ , the t-test statistics, effect-size and coefficient  
 332 of determination for the three LMR.

333 **Table 2.** Separate stepwise LMR using demographic and behavioural variables to predict  
 334 Perceived Stress, Depression and Anxiety symptoms. The table provides the coefficient of

335 regression ( $\beta$ ), the t-test and effect-size. Additionally, results present the coefficient of  
 336 determination ( $r^2$ ) to assess the amount of variance explained by models.

| Variable                         | Multiple Linear Regression Statistics |        |             |       |
|----------------------------------|---------------------------------------|--------|-------------|-------|
|                                  | $\beta$                               | t-test | effect-size | $r^2$ |
| Perceived Stress (PSS-10) time 2 |                                       |        |             | 0.56  |
| (Intercept)                      | 1.13                                  | 0.67   | 0.20        |       |
| PSS-10 time 1**                  | 3.78                                  | 4.98   | 0.62        |       |
| Gender*                          | 0.35                                  | 2.03   | 0.25        |       |
| Feeling Imprisoned*              | 1.28                                  | 1.97   | 0.16        |       |
| Days in quarantine*              | 0.75                                  | 2.02   | 0.20        |       |
| Days of exercise**               | 3.46                                  | 3.38   | 0.53        |       |
| Types of exercise**              | 2.41                                  | 3.95   | 0.56        |       |
| Risk for COVID-19**              | 2.87                                  | 4.77   | 0.59        |       |
| Changes in freq. Exercise*       | -1.54                                 | 2.01   | 0.13        |       |
| Depression (FDI) time 2          |                                       |        |             | 0.33  |
| (Intercept)**                    | -9.02                                 | 4.97   | 0.60        |       |
| FDI time 1**                     | 3.75                                  | 5.76   | 0.42        |       |
| Gender*                          | 0.48                                  | 1.98   | 0.18        |       |
| Types of exercise**              | 2.54                                  | 3.41   | 0.34        |       |
| Understanding*                   | -1.87                                 | 1.99   | 0.19        |       |
| Education*                       | -0.96                                 | 2.08   | 0.33        |       |
| State Anxiety (S-STAI) time 2    |                                       |        |             | 0.42  |
| (Intercept)                      | -9.41                                 | 1.14   | 0.40        |       |
| S-STAI time 1**                  | 3.41                                  | 4.71   | 0.37        |       |
| Change on diet**                 | -2.65                                 | 3.62   | 0.14        |       |
| Weight Loss**                    | 2.90                                  | 2.01   | 0.10        |       |
| Age*                             | 0.20                                  | 3.59   | 0.50        |       |
| Feeling Safe**                   | -3.90                                 | 3.89   | 0.44        |       |
| Feeling Imprisoned*              | 1.05                                  | 2.59   | 0.70        |       |
| Risk for COVID-19**              | 4.75                                  | 3.65   | 0.34        |       |
| Amount of information*           | 2.18                                  | 1.98   | 0.11        |       |

337 Note: \*  $p < 0.05$ ; \*\*  $p < 0.01$

338

### 339 Discussion

340 The current investigation provides a unique glimpse into the mental health of  
 341 Brazilians at the beginning of government-mandated quarantine from the COVID-19 pandemic,  
 342 a novel, disruptive and society-wide stressor. Findings indicate that a substantial portion of  
 343 respondents were distressed at both time points, with worsening mental health from the initiation  
 344 of quarantine to a point a few weeks later. More specifically, increases in perceived stress,  
 345 symptoms of depression and state anxiety were observed, with a gender by time interaction  
 346 recorded for stress. Men experienced increases in depression and anxiety over time, but not for  
 347 perceived stress. Across genders, the number of days in quarantine was linearly related to worse  
 348 perceptions of perceived stress. Repeated measures ANOVA revealed that 3 factors were all  
 349 related to worse levels of stress, depression and anxiety: female gender, worsening diet and  
 350 excess of COVID-19 information. In regression analyses, however, mental health outcomes were  
 351 associated with a variety of other demographic, COVID-19 specific, and behavioural factors,  
 352 such as use of tele-psychotherapy. Exercise-related factors, such as exercise frequency, were the  
 353 predominate predictors of perceived stress.

354 A substantial portion of the participants reported levels of stress, depression and anxiety  
355 above established means for the population. At time 2, greater than 70% of the sample was above  
356 the normative mean for both stress and depression. For anxiety, >60% of both men and women  
357 were above the normative mean. More importantly, some participants scored very high for  
358 mental health disturbances, especially at time 2. For stress, 9.7% of the sample was above 2 SD  
359 at time 2, whereas the prevalence according to the Brazilian norms is 6.8% (Cacciari et al.,  
360 2016). This was an increase from 6.9% at time 1. Similar trends were seen for depression (4.2%  
361 at time 1, 8.0% at time 2; versus a norm of 4.1%) (Filgueiras et al., 2014) and state anxiety (8.7%  
362 increasing to 14.9%; versus a norm of 9.4%) (Pasquali et al., 1994). This is similar to anxiety  
363 levels observed in a large sample during quarantine in China (Hu et al., 2020). While the  
364 percentage of individuals scoring at these extremes is still relatively low, it potentially represents  
365 a huge increase in burden to society when multiplied across the entire population. Mental health  
366 initiatives on the national level would have to be scaled up to meet new demand (Funk et al.,  
367 2008). Key to this endeavour would be: a) identifying those most at risk and b) properly  
368 assessing their condition.

369 In the effort to identify those most at risk, pertinent predictors of mental health outcomes  
370 were analysed. Interestingly, each mental health indicator was predicted by a varying set of  
371 factors. Anxiety was predicted by the greatest number of COVID-19 related factors: feelings of  
372 safety, feelings of being imprisoned, risk for COVID-19 and amount of information. In other  
373 words, those who felt unsafe, cooped up, at risk for infection and being inundated with  
374 information demonstrated higher levels of anxiety. This falls in line with an expansive literature  
375 reporting that feelings of anxiety burgeon when people feel under threat, unsafe, have too many  
376 options and an uncertain future (Carretta et al., 2014; Gilbert et al., 2008). Depression, a  
377 condition which can be usually seen as compromised of regrets from the past (Buechler, 2015),  
378 was understandably not predicted by COVID-19 related factors. Only “understanding what is  
379 happening” was a significant inverse predictor. Stress was predicted by feelings of being  
380 imprisoned, days in quarantine and risk for COVID-19 and also by a number of exercise factors.

381 Other similar longitudinal studies during the COVID-19 pandemic also found similar  
382 results. For example, O'Connor et al. (2020) gathered information about mental health and  
383 wellbeing among adults in UK during lockdown. They found that suicidal ideation increased  
384 over time. Additionally, symptoms of anxiety increased and those with pre-existing mental  
385 health problems showed worse mental health outcomes, longitudinally. On the other hand,  
386 symptoms of depression were stable; nonetheless, it is important to highlight that suicidal  
387 ideation is a symptom of depression and the scale adopted by O'Connor et al. (2020) is a 9-item  
388 brief self-report questionnaire based on DSM-IV, whereas the FDI adopted in the present  
389 research is a 30-item psychometric measure based on DSM-V. Differences in number of items,  
390 items structure and diagnosis criteria are potential explanations for the differences between  
391 O'Connor et al. (2020) findings and this study regarding depressive symptoms. A longitudinal  
392 cohort study from UK also suggests that general mental health deteriorated when compared to  
393 the period before the COVID-19 pandemic (Pierce et al., 2020); however, there were no

394 specificities regarding different types of psychiatric symptoms. Their findings corroborate to this  
395 study regarding gender and age: younger women tend to show poorer mental health.

396 A study by Canet-Juric et al. (2020) some conflicts with the findings of the present study,  
397 even though their sample comes from Argentina, a Brazilian neighbour in South America.  
398 Therefore, the cultural and social conditions seem to play an important role in mental health.  
399 They found that depression increased through time, differently from the stability found by  
400 O'Connor et al. (2020), though anxiety decreased. In comparison to the results from Canet-Juric  
401 et al. (2020), the present study corroborates to an increase of the symptoms of depression, but it  
402 goes in the opposite direction regarding symptoms of anxiety. Longitudinal studies (Canet-Juric  
403 et al. (2020); O'Connor et al. (2020); Pierce et al. (2020)) suggest changes in levels of symptoms  
404 in mental health during the COVID-19 pandemic, however, there is no common ground so far  
405 and future studies should consider cultural and social variables to explain this phenomenon.

406 In general, exercise was associated with mental health outcomes in the expected manner –  
407 more frequent exercise and aerobic exercise were related to the lowest levels of distress. For all 3  
408 mental health outcomes, those with no exercise (0 days per week) had the highest average levels  
409 of stress (22.9 at time 1 to 26.4 at time 2), depression (69.0 to 74.6) and anxiety (48.2 to 54.7).  
410 These seems to support the previous findings that “something is better than nothing” (Ekkekakis  
411 et al., 2000; Werneck et al., 2018). In linear regression, perceived stress was related to the  
412 greatest number of exercise-related factors: exercise frequency per week, type of exercise and  
413 perceived changes in exercise behavior. Higher frequency of exercise (days/week) was  
414 associated with less stress. However, the linear relationship between perceived stress and  
415 exercise frequency was small ( $r = -.28$ ), which is line with previous investigations (Stults-  
416 Kolehmainen and Sinha, 2014). It should be noted that 58.2% of the sample reported that they  
417 perceived that their exercise behaviour changed within a few weeks of quarantine (30.8% doing  
418 less and 28.3% doing more), which follows the known phenomenon that stressful events can  
419 either inhibit or activate changes in exercise behaviors (Stults-Kolehmainen and Sinha, 2014).  
420 Furthermore, those who perceived that they exercised more frequently from Time 1 to Time 2  
421 had less stress. Interestingly, of those very high for stress ( $< 2SD$ ), 82% do no exercise at all, but  
422 the remaining 18% complete 6 days a week of exercise. In LMR analysis, exercise factors  
423 explained 13.1% of the adjusted variance in stress. It has been hypothesized that a lack of  
424 physical activity can lead to feelings of tension for those accustomed to it. Furthermore, stressful  
425 circumstances may activate desires, wants, or urges to move and be active in some individuals  
426 (Stults-Kolehmainen et al., 2020). For repeated measures, the results were slightly different, with  
427 changes in exercise not being significant, but use of online fitness coaching reaching  
428 significance. An interaction was observed in that those who performed aerobic exercise had the  
429 lowest levels of depression at both time points. In fact, those who did aerobic exercise did not  
430 have any increase in depression. However, the clearest association of exercise frequency and  
431 mental health was for anxiety. Those at the highest levels of exercise had the lowest anxiety and  
432 each day less was associated with more anxiety.



433           Aside from exercise, there were notable findings for dietary habits and use of tele-  
434 psychotherapy. Those who rated their dietary habits as becoming worse also had higher levels of  
435 stress, depression and anxiety. Those with the highest levels of anxiety were those with  
436 worsening diet at the second time point (effect size for interaction was .37). Those who used  
437 online nutrition services had lower levels of depression, but there was no difference for stress or  
438 anxiety. Those who utilized online psychotherapy reported lower levels of depression and  
439 anxiety. While there is no income data to explain use of online resources, those using online  
440 resources were more educated. Thus, one might surmise that those from better off demographic  
441 groups are less affected partly because of greater access to resources. Given the limited quantity  
442 of resources to mitigate mental health impairments during crises, such as pandemic and  
443 quarantine, it is crucial to identify the risk factors that may predispose individuals for worsening  
444 outcomes. Further, it is crucial to allocate or develop resources that can have a wide reach to  
445 affected populations.

446

## 447 **Limitations of the Study**

448           Despite the progress this study makes in tracking changes in mental health and  
449 identifying risk factors, the current research does demonstrate some limitations. First, there was  
450 no pre-quarantine baseline and assessments spanned less than a single month. Furthermore,  
451 validated measures of exercise and dietary habits, which can be very lengthy, were not utilized to  
452 reduce survey fatigue. More importantly, the current data needs interpreted with some caution  
453 because factors other than quarantine could contribute to changes in the mental health outcomes  
454 observed, such as growing political and economic unrest in Brazil (Prado, 2020). At the time of  
455 data collection, Brazil was going through political and social changes with a far-right  
456 government and our results must be seen in perspective. The first reaction of the Brazilian  
457 president towards COVID-19 was denial and down-play of the seriousness of the virus. Further,  
458 public policies were adopted based on conspiracy theories (Barberia and Gómez, 2020). The  
459 political view of the Brazilian leader has influenced the population's perspective towards  
460 quarantine. A study from Ramos et al. (2020) showed that Brazilians who share the same  
461 political beliefs with the president tend to trust in non-scientific assumptions that reduces their  
462 own perception of risk. This distrust leads to less careful behaviours and may have influenced the  
463 present results. The fact that this study did not consider political views constitute a limitation that  
464 should be considered. Also, it should be noted that effect sizes for changes within approximately  
465 three weeks were small (Cohen's *d* were .25 – stress, .30 – depression, and .38 – anxiety),  
466 possibly because in some cases individuals had improved mental health ( $n = 31$ ; 8.6%) due to  
467 quarantine conditions, such as being closer to loved ones throughout the day or being removed  
468 from dangerous work environments. This sample may be considered small compared to other  
469 longitudinal studies (e.g., Canet-Juric et al. (2020); O'Connor et al. (2020); Pierce et al. (2020)),  
470 and therefore, may exhibit less robust inferential analyses - in terms of reliability and normality  
471 of data. Lastly, the data was self-reported as it was collected online on Google Forms. Finally,

## 472 **Conclusion**

473 This study found that mental health worsened following a government-mandated  
474 quarantine in Brazil. These data are unique because observations were made in the first days and  
475 weeks after quarantine was decreed due to the COVID-19 pandemic crisis. Specifically, from the  
476 time point when quarantine was decreed until 1 month later, worsening perceived stress,  
477 symptoms of depression and anxiety was observed in this sample of the Brazilian population.  
478 Analyses from this study identified several risk factors for mental health, including gender (being  
479 female), lower education, less frequent exercise, worsening diet and a lack of resources, such as  
480 access to tele-psychotherapy. COVID-19 related factors predicted anxiety and stress more so  
481 than symptoms of depression. The implications of these data are clear; mental health worsens,  
482 requiring more resources to improve the experience of life in quarantine. The extent to which  
483 these can be diligently developed and allocated will depend on a data-driven process that begins  
484 with monitoring and analysing data as we and others have initiated.

485

## 486 **Authorship**

487 A.F. designed the study and collected data. M.B. and A.F. performed analysis. A.F. and M.S.K.  
488 drafted the manuscript. M.B assisted with interpretation of result and provided critical revisions.  
489 All authors approved of the final version of the paper for submission.

## 490 **Acknowledgements**

491 The present research is funded by the Coordenacao de Aperfeicoamento de Pessoal de Nivel  
492 Superior (CAPES) of the Ministry of Education of Brazil under the PROAP program.

## 493 **Conflict of interest**

494 Authors report no conflict of interest.

495

## 496 **References**

- 497 Almeida DM and Kessler RC (1998) Everyday stressors and gender differences in daily distress.  
498 *J Pers Soc Psychol* 75(3): 670-680.
- 499 Bai Y, Lin CC, Lin CY, et al. (2004) Survey of stress reactions among health care workers  
500 involved with the SARS outbreak. *Psychiatr Serv* 55(9): 1055-1057.
- 501 Barberia LG and Gómez EJ (2020) Political and institutional perils of Brazil's COVID-19 crisis.  
502 *Lancet* 396(10248): 367-368.
- 503 Blacutt M, Filgueiras A and Stults-Kolehmainen M (2021) Prevalence and incidence of stress,  
504 depression, and anxiety symptoms among Brazilians in quarantine across the early phases  
505 of the COVID-19 crisis. *medRxiv*. DOI: 10.1101/2021.09.07.21263246.  
506 2021.2009.2007.21263246.
- 507 Brooks SK, Webster RK, Smith LE, et al. (2020) The psychological impact of quarantine and  
508 how to reduce it: rapid review of the evidence. *The Lancet* 395(10227): 912-920.

- 509 Buechler S (2015) La alegría, la vergüenza, el arrepentimiento y la tristeza en la terapia1. *Clínica*  
510 *e Investigación Relacional* 9(2): 345-357.
- 511 Cacciari P, Haddad MdCL and Dalmas JC (2016) Nível de estresse em trabalhadores  
512 readequados e readaptados em universidade estadual pública. *Texto & Contexto-*  
513 *Enfermagem* 25.
- 514 Canet-Juric L, Andrés ML, Del Valle M, et al. (2020) A longitudinal study on the emotional  
515 impact cause by the COVID-19 pandemic quarantine on general population. *Frontiers in*  
516 *Psychology* 11: 2431.
- 517 Carretta CM, Ridner SH and Dietrich MS (2014) Hope, hopelessness, and anxiety: A pilot  
518 instrument comparison study. *Archives of Psychiatric Nursing* 28(4): 230-234.
- 519 Christensen H, Jorm AF, Mackinnon AJ, et al. (1999) Age differences in depression and anxiety  
520 symptoms: a structural equation modelling analysis of data from a general population  
521 sample. *Psychological medicine* 29(2): 325-339.
- 522 Cohen S and Williamson G (1998) Perceived stress in a probability sample of the United States.  
523 In: Spacapan S and Oskamp S (eds) *The social psychology of health: Claremont*  
524 *Symposium on applied social psychology*. Newbury Park, CA: Sage, pp.31-67.
- 525 Craft LL and Landers DM (1998) The effect of exercise on clinical depression and depression  
526 resulting from mental illness: A meta-analysis. *Journal of Sport and Exercise Psychology*  
527 20(4): 339-357.
- 528 de Oliveira GD, Oancea SC, Nucci LB, et al. (2018) The association between physical activity  
529 and depression among individuals residing in Brazil. *Social psychiatry and psychiatric*  
530 *epidemiology* 53(4): 373-383.
- 531 Ekkekakis P, Hall EE, VanLanduyt LM, et al. (2000) Walking in (affective) circles: can short  
532 walks enhance affect? *Journal of behavioral medicine* 23(3): 245-275.
- 533 Filgueiras A, Hora G, Fioravanti-Bastos ACM, et al. (2014) Development and psychometric  
534 properties of a novel depression measure. *Temas em Psicologia* 22(1): 249-269.
- 535 Filgueiras A and Stults-Kolehmainen M (2021) Risk Factors for Potential Mental Illness Among  
536 Brazilians in Quarantine Due To COVID-19. *Psychological Reports*. DOI:  
537 10.1177/0033294120976628. 0033294120976628.
- 538 Funk M, Organization WH, World Organization of National Colleges A, et al. (2008) *Integrating*  
539 *Mental Health Into Primary Care: A Global Perspective*. World Health Organization.
- 540 Gilbert P, McEwan K, Mitra R, et al. (2008) Feeling safe and content: A specific affect  
541 regulation system? Relationship to depression, anxiety, stress, and self-criticism. *The*  
542 *Journal of Positive Psychology* 3(3): 182-191.
- 543 Hawryluck L, Gold WL, Robinson S, et al. (2004) SARS control and psychological effects of  
544 quarantine, Toronto, Canada. *Emerging infectious diseases* 10(7): 1206.
- 545 Heckathorn DD (2011) Snowball versus Respondent-Driven Sampling. *Sociol Methodol* 41(1):  
546 355-366.
- 547 Hu W, Su L, Qiao J, et al. (2020) Countrywide quarantine only mildly increased anxiety level  
548 during COVID-19 outbreak in China. *medRxiv*.
- 549 Imperial College COVID-19 Response Team (2021) *Short-term forecasts of COVID-19 deaths*  
550 *in multiple countries*. (accessed September 20).
- 551 INLOCO (2021) *Mapa brasileiro da COVID-19*. Available at:  
552 <https://mapabrasileirodacovid.inloco.com.br/pt> (accessed September 20).
- 553 Jeong H, Yim HW, Song Y-J, et al. (2016) Mental health status of people isolated due to Middle  
554 East Respiratory Syndrome. *Epidemiology and health* 38.

- 555 Landers DM and Arent SM (2007) Physical activity and mental health.
- 556 Molendijk M, Molero P, Sánchez-Pedreño FO, et al. (2018) Diet quality and depression risk: a  
557 systematic review and dose-response meta-analysis of prospective studies. *Journal of*  
558 *affective disorders* 226: 346-354.
- 559 Nolen-Hoeksema S and Hilt LM (2009) Gender differences in depression.
- 560 O'Connor RC, Wetherall K, Cleare S, et al. (2020) Mental health and well-being during the  
561 COVID-19 pandemic: longitudinal analyses of adults in the UK COVID-19 Mental  
562 Health & Wellbeing study. *Br J Psychiatry*. Epub ahead of print 2020/10/22. DOI:  
563 10.1192/bjp.2020.212. 1-8.
- 564 O'Neil A, Quirk SE, Housden S, et al. (2014) Relationship between diet and mental health in  
565 children and adolescents: a systematic review. *American journal of public health*  
566 104(10): e31-e42.
- 567 Pasquali L, Pinelli Júnior B and Solha AC (1994) Contribuição à validação e normalização da  
568 escala de ansiedade-traço do IDATE. *Psicol. teor. pesqui.* 411-420.
- 569 Pierce M, Hope H, Ford T, et al. (2020) Mental health before and during the COVID-19  
570 pandemic: a longitudinal probability sample survey of the UK population. *The Lancet*  
571 *Psychiatry* 7(10): 883-892.
- 572 Prado B (2020) COVID-19 in Brazil: "So what?". *Lancet* 395(10235): 1461.
- 573 Prince M, Patel V, Saxena S, et al. (2007) No health without mental health. *The Lancet*  
574 370(9590): 859-877.
- 575 Qiu J, Shen B, Zhao M, et al. (2020) A nationwide survey of psychological distress among  
576 Chinese people in the COVID-19 epidemic: implications and policy recommendations.  
577 *General psychiatry* 33(2).
- 578 Ramos G, Vieites Y, Jacob J, et al. (2020) Political orientation and support for social distancing  
579 during the COVID-19 pandemic: evidence from Brazil. *Revista de Administração*  
580 *Pública* 54: 697-713.
- 581 Rubin GJ and Wessely S (2020) The psychological effects of quarantining a city. *Bmj* 368.
- 582 São Paulo (2020) *Decreto 64.881: Decreta quarentena no Estado de São Paulo, no contexto da*  
583 *pandemia do COVID-19 (Novo Coronavírus), e dá providências complementares.* .  
584 Available at: [https://www.saopaulo.sp.gov.br/wp-content/uploads/2020/03/decreto-](https://www.saopaulo.sp.gov.br/wp-content/uploads/2020/03/decreto-quarentena.pdf)  
585 [quarentena.pdf](https://www.saopaulo.sp.gov.br/wp-content/uploads/2020/03/decreto-quarentena.pdf) (accessed September 2020).
- 586 Spielberger C, Gorsuch R, Lushene R, et al. (1983) *Manual for the State-Trait Anxiety Inventory*  
587 *(Form Y1 – Y2)*.
- 588 Steele LS, Dewa CS, Lin E, et al. (2007) Education level, income level and mental health  
589 services use in Canada: associations and policy implications. *Healthcare Policy* 3(1): 96.
- 590 Stults-Kolehmainen MA (2013) The interplay between stress and physical activity in the  
591 prevention and treatment of cardiovascular disease. *Frontiers in physiology* 4: 346.
- 592 Stults-Kolehmainen MA, Blacutt M, Bartholomew JB, et al. (2020) Motivation states for  
593 physical activity and sedentary behavior: desire, urge, wanting, and craving. *Frontiers in*  
594 *Psychology* 11: 3076.
- 595 Stults-Kolehmainen MA and Sinha R (2014) The effects of stress on physical activity and  
596 exercise. *Sports medicine* 44(1): 81-121.
- 597 Stults-Kolehmainen MA, Tuit K and Sinha R (2014) Lower cumulative stress is associated with  
598 better health for physically active adults in the community. *Stress* 17(2): 157-168.

- 599 Taylor MR, Agho KE, Stevens GJ, et al. (2008) Factors influencing psychological distress  
600 during a disease epidemic: data from Australia's first outbreak of equine influenza. *BMC*  
601 *public health* 8(1): 1-13.
- 602 Trautmann S, Rehm J and Wittchen HU (2016) The economic costs of mental disorders: Do our  
603 societies react appropriately to the burden of mental disorders? *EMBO reports* 17(9):  
604 1245-1249.
- 605 Vigo DV, Kestel D, Pendakur K, et al. (2019) Disease burden and government spending on  
606 mental, neurological, and substance use disorders, and self-harm: cross-sectional,  
607 ecological study of health system response in the Americas. *The Lancet Public Health*  
608 4(2): e89-e96.
- 609 Werneck AO, Oyeyemi AL and Silva DR (2018) Physical activity and depression: is 150  
610 min/week of moderate to vigorous physical activity a necessary threshold for decreasing  
611 risk of depression in adults? Different views from the same data. *Social psychiatry and*  
612 *psychiatric epidemiology* 53(3): 323-324.
- 613 Wilder-Smith A and Freedman DO (2020) Isolation, quarantine, social distancing and  
614 community containment: pivotal role for old-style public health measures in the novel  
615 coronavirus (2019-nCoV) outbreak. *Journal of travel medicine*.
- 616 Wilson Z (2016) Out of the shadows-making mental health a global development priority.  
617 *Mental Health Matters* 3(3): 1-4.
- 618 Wipfli BM, Rethorst CD and Landers DM (2008) The anxiolytic effects of exercise: a meta-  
619 analysis of randomized trials and dose-response analysis. *Journal of Sport and Exercise*  
620 *Psychology* 30(4): 392-410.
- 621 World Health Organization (2004) *Promoting mental health: Concepts, emerging evidence,*  
622 *practice: Summary report*. World Health Organization.
- 623 World Health Organization (2020) Considerations for quarantine of individuals in the context of  
624 containment for coronavirus disease ( COVID-19): interim guidance, 19 March 2020.  
625 Reportno. Report Number|, Date. Place Published|: Institution|.
- 626
- 627
- 628
- 629
- 630
- 631
- 632
- 633



634 **Supplemental Material 1.**

635 Results of repeated-measures ANOVA with F-statistics, degree of freedom (df), p-value and  
 636 effect size for each psychosocial factor (stress, depression and anxiety) by demographic and  
 637 behavioural variables separately.

| Variable                                   | Repeated-measures statistics |       |         |             |                  |       |         |             |                        |       |         |             |
|--------------------------------------------|------------------------------|-------|---------|-------------|------------------|-------|---------|-------------|------------------------|-------|---------|-------------|
|                                            | Perceived Stress (PSS-10)    |       |         |             | Depression (FDI) |       |         |             | State Anxiety (S-STAI) |       |         |             |
|                                            | F-statistics                 | df    | p-value | effect-size | F-statistics     | df    | p-value | effect-size | F-statistics           | df    | p-value | effect-size |
| <i>Gender</i>                              |                              |       |         |             |                  |       |         |             |                        |       |         |             |
| Between                                    | 74.50                        |       | <0.001  | 0.28        | 33.97            |       | <0.001  | 0.09        | 14.19                  |       | <0.001  | 0.11        |
| Within                                     | 7.70                         | 1.358 | <0.010  | 0.23        | 28.17            | 1.358 | <0.001  | 0.29        | 57.61                  | 1.358 | <0.001  | 0.35        |
| Interaction                                | 20.74                        |       | <0.001  | 0.53        | 0.02             |       | =0.882  | 0.01        | 5.67                   |       | <0.050  | 0.03        |
| <i>Education</i>                           |                              |       |         |             |                  |       |         |             |                        |       |         |             |
| Between                                    | 1.91                         |       | =0.127  | 0.02        | 8.29             |       | <0.001  | 0.06        | 1.50                   |       | =0.214  | 0.03        |
| Within                                     | 9.08                         | 1.356 | <0.005  | 0.17        | 15.73            | 1.356 | <0.001  | 0.13        | 31.63                  | 1.356 | <0.001  | 0.20        |
| Interaction                                | 1.21                         |       | =0.307  | 0.01        | 1.66             |       | =0.175  | 0.02        | 0.64                   |       | =0.589  | 0.01        |
| <i>Changes on Diet</i>                     |                              |       |         |             |                  |       |         |             |                        |       |         |             |
| Between                                    | 3.70                         |       | <0.050  | 0.13        | 8.75             |       | <0.001  | 0.18        | 74.06                  |       | <0.001  | 0.37        |
| Within                                     | 22.13                        | 1.357 | <0.001  | 0.29        | 22.42            | 1.357 | <0.001  | 0.12        | 39.45                  | 1.357 | <0.001  | 0.51        |
| Interaction                                | 1.17                         |       | =0.311  | 0.04        | 1.14             |       | =0.320  | 0.04        | 16.50                  |       | <0.001  | 0.25        |
| <i>Changes on Frequency of Exercise</i>    |                              |       |         |             |                  |       |         |             |                        |       |         |             |
| Between                                    | 0.54                         |       | =0.581  | 0.02        | 0.35             |       | =0.703  | 0.01        | 0.29                   |       | =0.748  | 0.01        |
| Within                                     | 21.66                        | 1.357 | <0.001  | 0.13        | 32.01            | 1.357 | <0.001  | 0.11        | 50.78                  | 1.357 | <0.001  | 0.17        |
| Interaction                                | 1.21                         |       | =0.298  | 0.04        | 0.72             |       | =0.490  | 0.03        | 1.07                   |       | =0.345  | 0.03        |
| <i>Number of days of exercise per week</i> |                              |       |         |             |                  |       |         |             |                        |       |         |             |
| Between                                    | 12.17                        |       | <0.001  | 0.32        | 1.06             |       | =0.378  | 0.04        | 2.19                   |       | =0.070  | 0.08        |
| Within                                     | 13.99                        | 1.355 | <0.001  | 0.37        | 23.16            | 1.355 | <0.001  | 0.16        | 30.11                  | 1.355 | <0.001  | 0.23        |
| Interaction                                | 3.21                         |       | <0.050  | 0.09        | 0.34             |       | =0.851  | 0.01        | 0.64                   |       | =0.634  | 0.02        |
| <i>Type of exercise</i>                    |                              |       |         |             |                  |       |         |             |                        |       |         |             |
| Between                                    | 9.68                         |       | <0.001  | 0.21        | 6.01             |       | <0.001  | 0.22        | 1.95                   |       | =0.121  | 0.08        |
| Within                                     | 29.53                        | 1.356 | <0.001  | 0.18        | 31.73            | 1.356 | <0.001  | 0.11        | 48.16                  | 1.356 | <0.001  | 0.19        |
| Interaction                                | 4.78                         |       | <0.005  | 0.11        | 3.82             |       | <0.050  | 0.08        | 0.25                   |       | =0.862  | 0.01        |
| <i>Amount of information</i>               |                              |       |         |             |                  |       |         |             |                        |       |         |             |
| Between                                    | 81.34                        |       | <0.001  | 0.11        | 5.39             |       | <0.050  | 0.09        | 4.65                   |       | <0.050  | 0.09        |
| Within                                     | 13.82                        | 1.357 | <0.001  | 0.13        | 5.45             | 1.357 | <0.050  | 0.10        | 12.92                  | 1.357 | <0.001  | 0.48        |
| Interaction                                | 4.37                         |       | <0.050  | 0.12        | 0.54             |       | =0.585  | 0.06        | 0.042                  |       | =0.958  | 0.01        |
| <i>Use of telemedicine</i>                 |                              |       |         |             |                  |       |         |             |                        |       |         |             |
| Between                                    | 1.12                         |       | =0.290  | 0.04        | 0.53             |       | =0.467  | 0.03        | 0.70                   |       | =0.402  | 0.03        |
| Within                                     | 4.00                         | 1.358 | <0.050  | 0.09        | 9.63             | 1.358 | <0.001  | 0.11        | 21.26                  | 1.358 | <0.001  | 0.19        |
| Interaction                                | 1.56                         |       | =0.212  | 0.03        | 0.48             |       | =0.487  | 0.03        | 0.02                   |       | =0.893  | 0.01        |
| <i>Use of online nutrition</i>             |                              |       |         |             |                  |       |         |             |                        |       |         |             |
| Between                                    | 1.35                         |       | =0.246  | 0.06        | 8.39             |       | <0.050  | 0.09        | 0.15                   |       | =0.700  | 0.08        |
| Within                                     | 23.86                        | 1.358 | <0.001  | 0.18        | 29.48            | 1.358 | <0.001  | 0.25        | 96.91                  | 1.358 | <0.001  | 0.28        |
| Interaction                                | 2.61                         |       | =0.107  | 0.06        | 0.86             |       | =0.355  | 0.03        | 41.93                  |       | <0.001  | 0.35        |
| <i>Use of online fitness coaching</i>      |                              |       |         |             |                  |       |         |             |                        |       |         |             |
| Between                                    | 4.95                         |       | <0.050  | 0.08        | 0.25             |       | =0.619  | 0.03        | 0.04                   |       | =0.841  | 0.02        |
| Within                                     | 19.25                        | 1.358 | <0.001  | 0.14        | 32.02            | 1.358 | <0.001  | 0.21        | 46.91                  | 1.358 | <0.001  | 0.32        |
| Interaction                                | 1.23                         |       | =0.268  | 0.04        | 0.01             |       | =0.988  | 0.01        | 0.61                   |       | =0.436  | 0.03        |
| <i>Use of telepsychotherapy</i>            |                              |       |         |             |                  |       |         |             |                        |       |         |             |
| Between                                    | 0.01                         |       | =0.944  | 0.01        | 22.49            |       | <0.001  | 0.22        | 4.99                   |       | <0.050  | 0.07        |
| Within                                     | 20.29                        | 1.358 | <0.001  | 0.26        | 42.18            | 1.358 | <0.001  | 0.31        | 55.87                  | 1.358 | <0.001  | 0.40        |
| Interaction                                | 0.09                         |       | =0.765  | 0.06        | 10.59            |       | <0.001  | 0.33        | 3.93                   |       | <0.050  | 0.07        |
| <i>Risk for COVID-19</i>                   |                              |       |         |             |                  |       |         |             |                        |       |         |             |
| Between                                    | 74.48                        |       | <0.001  | 0.37        | 0.60             |       | =0.440  | 0.02        | 19.60                  |       | <0.001  | 0.10        |
| Within                                     | 37.98                        | 1.358 | <0.001  | 0.18        | 29.46            | 1.358 | <0.001  | 0.13        | 57.28                  | 1.358 | <0.001  | 0.47        |
| Interaction                                | 16.74                        |       | <0.001  | 0.19        | 0.35             |       | =0.555  | 0.03        | 6.17                   |       | <0.050  | 0.09        |

Note: Cohen's f interpretation is as follows above 0.10 and below 0.25, small effect-size, above 0.25 and below 0.40, moderate effect size, and above 0.40, large effect-size.

638

639
